# Supplementary material for: Photo-rechargeable fuel cell using photo-hydrogenation reactions of quinone molecules
Source: Royal Society of Chemistry journal article supplement (doi:10.1039/c9nj04782d), 2020-01-01
Supplement: c9nj04782d1.pdf [file c9nj04782d1.pdf]

Electronic Supplementary Information

## Photo-rechargeable fuel cell using photo-hydrogenation reactions of quinone molecules

*Yosuke Ishii<sup>1\*</sup>, Keisuke Kurimoto<sup>1</sup>, Kento Hosoe<sup>1</sup>, Remi Date<sup>1</sup>, Itta Yamada<sup>1</sup>, and Shinji  
Kawasaki<sup>1\*</sup>*

Department of Life Science and Applied Chemistry, Nagoya Institute of Technology, Gokiso-cho,  
Showa-ku, Nagoya 466-8555, Japan.

\*E-mail: [ishii.yosuke@nitech.ac.jp](mailto:ishii.yosuke@nitech.ac.jp), [kawasaki.shinji@nitech.ac.jp](mailto:kawasaki.shinji@nitech.ac.jp); Tel/Fax: +81-52-735-5221

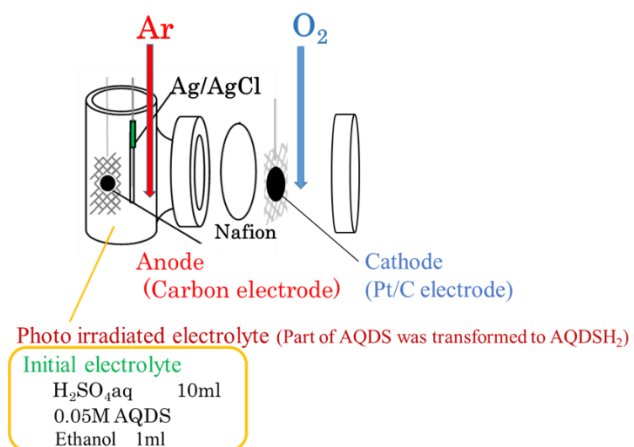

(1) Electric Charge & Electric Discharge

(A) Electric Charge

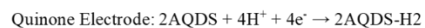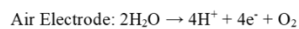

(B) Electric Discharge

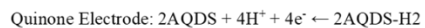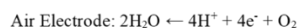

(2) Photo Charge & Electric Discharge

(A) Photo Charge

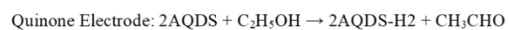

(B) Electric Discharge

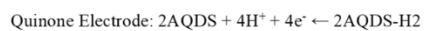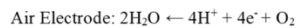

**Fig. S1.** A schematic picture (left) and electrode reaction (right) of our new concept photo-rechargeable fuel cell.

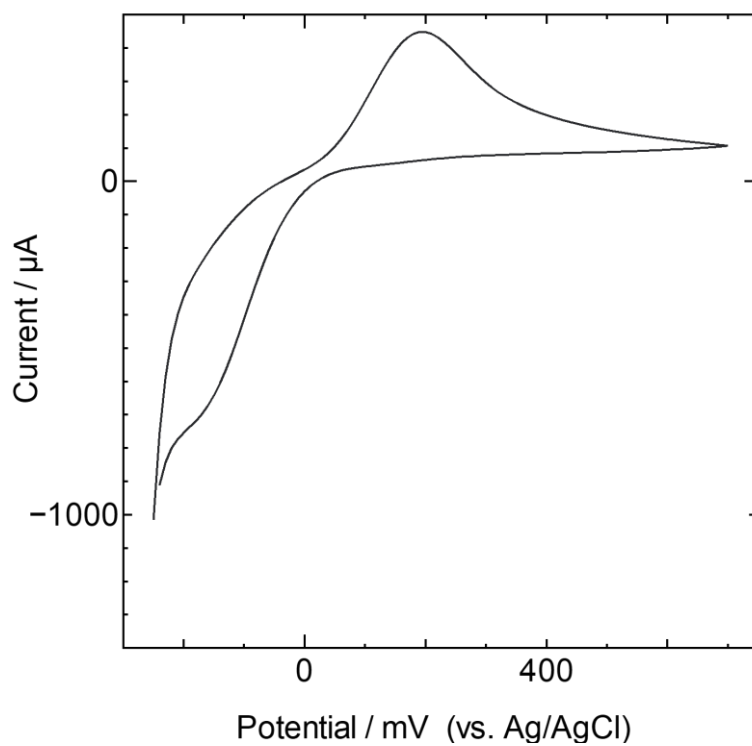

**Figure S2.** Cyclic voltammogram of 0.1 mol/L AQDS dissolved in  $\text{H}_2\text{SO}_4$  aqueous solution.

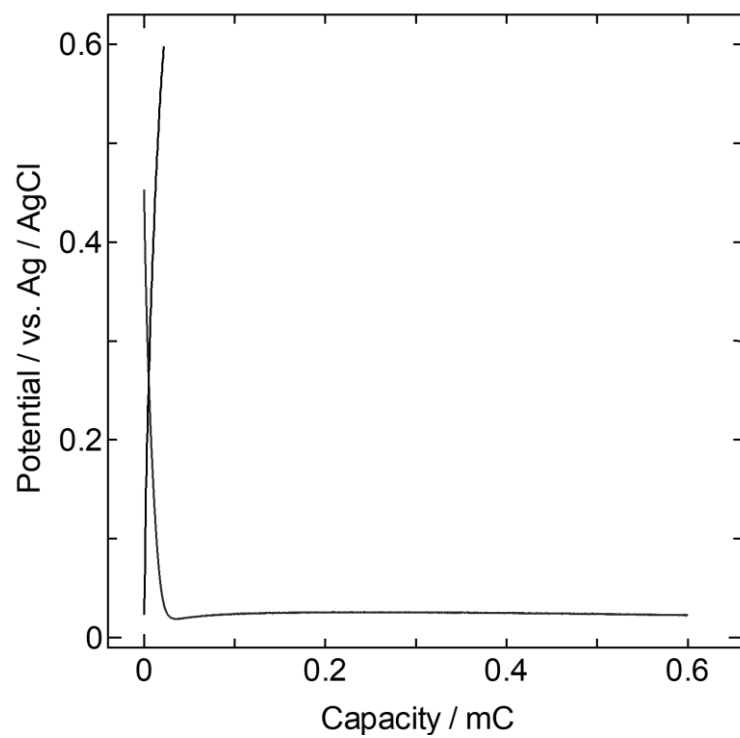

**Figure S3.** Electrochemical charge/discharge curves of the fuel cell without AQDS.

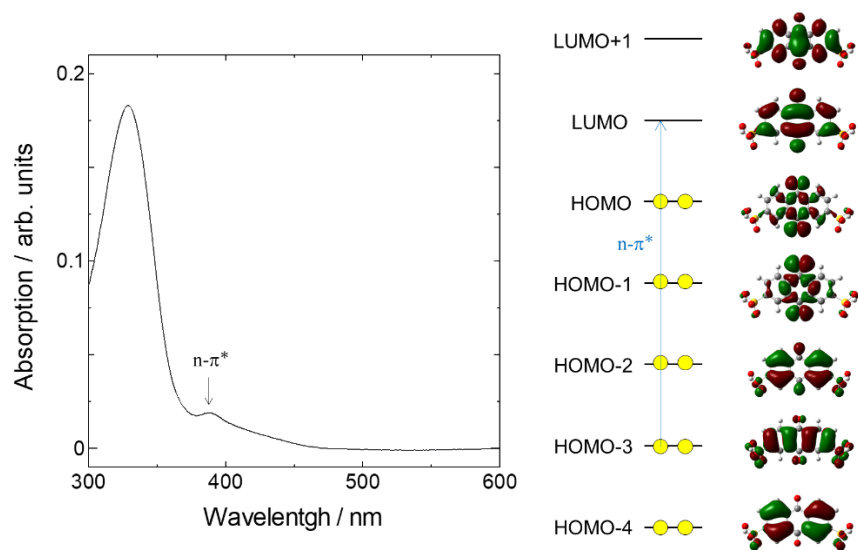

**Figure S4.** UV-Vis spectrum (left) and energy diagram (right) of AQDS.

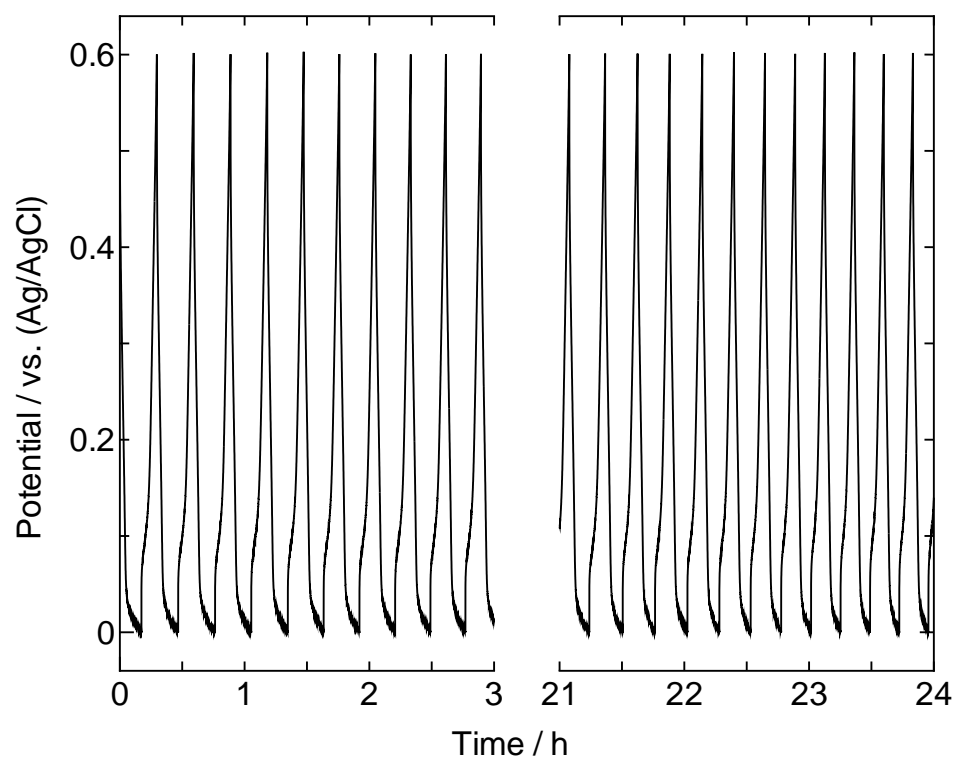

**Figure S5.** Cycle performance of the fuel cell by the electrochemical charge/discharge experiments (current density:  $3 \mu\text{A}/\text{cm}^2$ ).

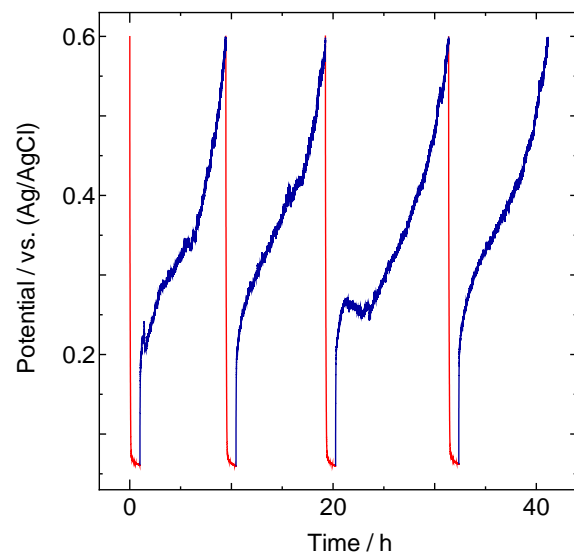

**Figure S6.** Cycle performance of the fuel cell by the photo-charging / electrochemical-discharge experiments (red line: photo-charging, blue line: electrochemical discharging).
